# Supplementary material for: Neuronal Precursor Cell-expressed Developmentally Down-regulated 4-1 (NEDD4-1) Controls the Sorting of Newly Synthesized CaV1.2 Calcium Channels
Source: PubMed Central journal article supplement — J Biol Chem. 2011 Jan 10;286(11):8829–38. doi: 10.1074/jbc.M110.166520 (PMC3059038; doi:10.1074/jbc.m110.166520), 2011-01-10
Supplement: supp_M110.166520_jbc.M110.166520-1.pdf [file supp_M110.166520_jbc.M110.166520-1.pdf]

# Supplemental figure 1.

## IP: Ca<sub>v</sub>1.2α1

|                                    |   |   |   |
|------------------------------------|---|---|---|
| Ca <sub>v</sub> 1.2α1              | - | + | + |
| Ca <sub>v</sub> β <sub>2</sub>     | - | + | + |
| Ca <sub>v</sub> α <sub>2</sub> δ-1 | - | + | + |
| Nedd4-1                            | - | - | + |

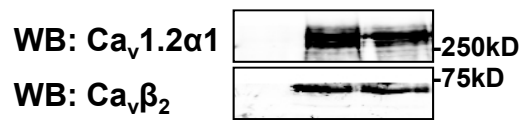

# Supplemental Figure 2

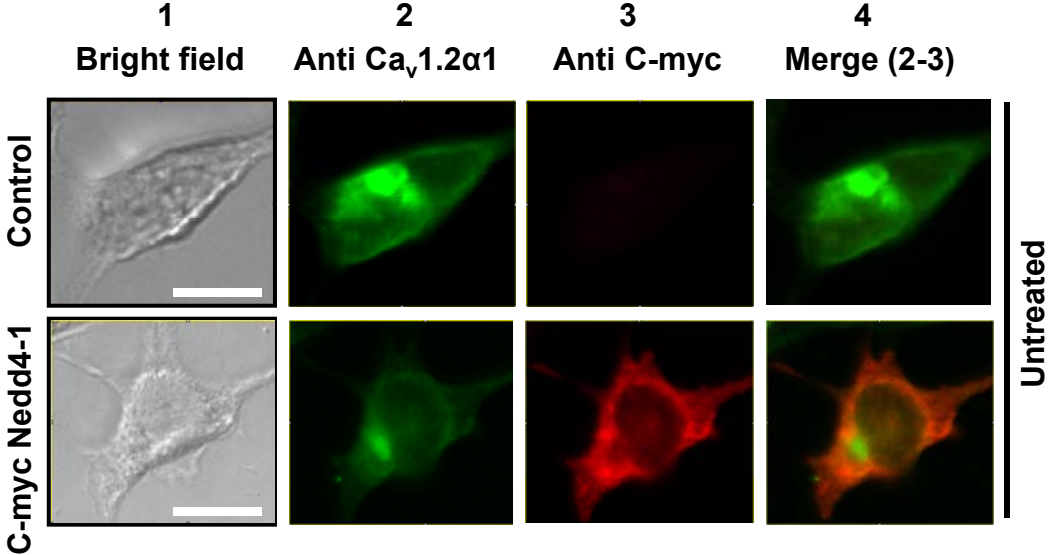

## Supplemental figure 3.

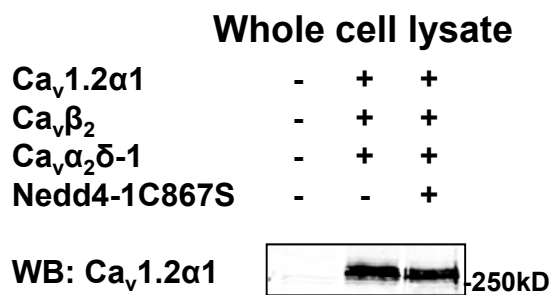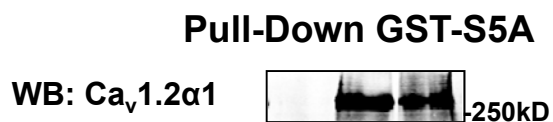

Supplemental figure 4.

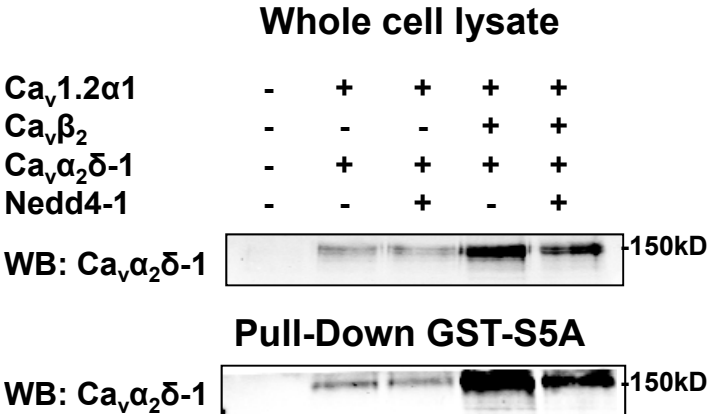

# Supplemental figure 5.

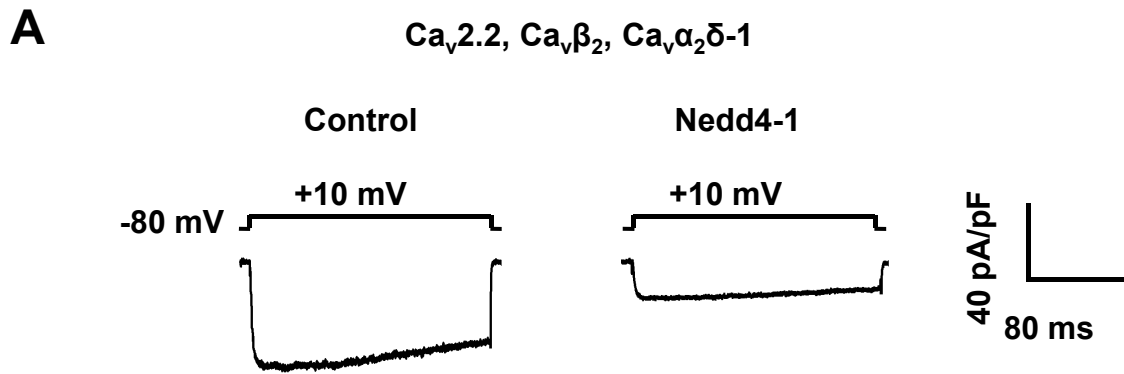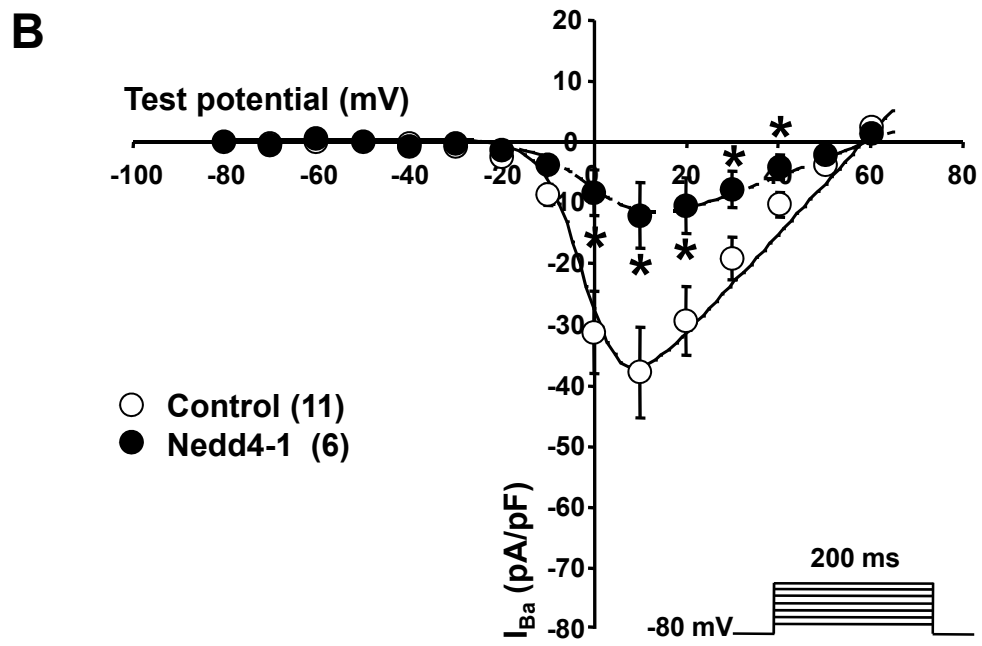

Supplemental Table 1. Effect of Nedd4-1 and Nedd4-1C867S on  $\text{Ca}_v$  biophysical properties.  $\text{Ca}_v1.2\alpha1/\alpha2\delta-1$  channels were expressed alone or together with  $\text{Ca}_v\beta1$ ,  $\text{Ca}_v\beta2$ ,  $\text{Ca}_v\beta2\text{Y221A}$ ,  $\text{Ca}_v\beta3$ ,  $\text{Ca}_v\beta4$ .  $\text{Ca}_v1.2\alpha1/\alpha2\delta-1$  channels were expressed with  $\text{Ca}_v\beta2$ . All experiments were performed with 5 mM  $\text{BaCl}_2$  with the exception of  $\text{Ca}_v1.2\alpha1/\alpha2\delta-1$  currents recorded in 20 mM  $\text{BaCl}_2$  extracellular solution. The upper and middle horizontal panels indicate the biophysical parameters corresponding to steady-state activation (SSA) and steady-state inactivation (SSI).  $V_{50}$  values indicate the respective voltage at which 50% of the channels are activated ( $V_{50}$  act), or inactivated ( $V_{50}$  inact), and  $k$  the slopes of the corresponding Boltzmann-fitted curves described in Material and Methods. The lower panel shows the corresponding current densities and percentage of variation (%) from the controls (100%). Values are means  $\pm$  SEM. The number of cells is indicated in parentheses. Values were compared versus control cells transfected with the channels only. \* $P < 0.05$ , \*\* $P < 0.01$  and \*\*\* $P < 0.001$ . ND: Not Determined.

Supplemental Fig. 1. Co-immunoprecipitation of  $\text{Ca}_v\beta2$  with  $\text{Ca}_v1.2\alpha1$  subunits.  $\text{Ca}_v1.2\alpha1$  was immunoprecipitated with anti- $\text{Ca}_v1.2\alpha1$  antibodies. Western-blots show that the amount of  $\text{Ca}_v\beta2$  co-immunoprecipitated with  $\text{Ca}_v1.2\alpha1$  was similar in control and Nedd4-1-transfected cells. Experiments were performed in duplicate.

Supplemental Fig.2. Immunocytochemistry and confocal imaging experiments showing the distribution of  $\text{Ca}_v1.2$  channels in control and Nedd4-1-transfected cells.  $\text{Ca}_v1.2$  was detected using an anti- $\text{Ca}_v1.2$ -ATTO-488 fluorescent primary antibody. Successful co-expression of c-myc-Nedd4-1 was assessed using mouse anti-c-myc primary and AlexaFluor594 anti-mouse secondary antibodies. Scale bars are 10  $\mu\text{m}$ .

Supplemental Fig. 3. Nedd4-1C867S fails to regulate the ubiquitylation of  $\text{Ca}_v1.2\alpha1$ . Ubiquitylated proteins were pulled-down using ubiquitin-binding GST-S5A and the presence of  $\text{Ca}_v1.2\alpha1$  in the isolated fraction was assessed by Western-blotting using anti- $\text{Ca}_v1.2\alpha1$  antibodies. Western-blots show that Nedd4-1C867S did not modify the amount of  $\text{Ca}_v1.2\alpha1$  proteins recovered from whole-cell lysates or GST-S5A pulled-down fractions. Experiments were performed in duplicate.

Supplemental Fig.4.  $\text{Ca}_v\alpha2\delta-1$  is not ubiquitylated by Nedd4-1. Ubiquitylated proteins were pulled-down using ubiquitin-binding GST-S5A and the presence of  $\text{Ca}_v\alpha2\delta-1$  in the isolated fraction was assessed by Western-blotting using anti- $\text{Ca}_v\alpha2\delta-1$  antibodies. Representative Western-blot showing that  $\text{Ca}_v\alpha2\delta-1$  is endogenously ubiquitylated and co-expressing  $\text{Ca}_v\beta$  promotes its ubiquitylation, however there was no effect of Nedd4-1 on the basal ubiquitylation of  $\text{Ca}_v\alpha2\delta-1$  (five independent experiments). Note that as for  $\text{Ca}_v1.2\alpha1$ , Nedd4-1 similarly reduced the amount of  $\text{Ca}_v\alpha2\delta-1$  recovered in whole-cell lysates and GST-S5A pulled-down fractions, when expressed together with  $\text{Ca}_v\beta$ .

Supplemental Fig.5. Nedd4-1 down-regulates  $\text{Ca}_v2.2$  channels. A, Representative whole-cell current traces and B, I-V relationships recorded from tsA-201 cells transfected with  $\text{Ca}_v2.2\alpha1/\text{Ca}_v\beta2/\text{Ca}_v\alpha2\delta-1$  channels alone (Control,  $\circ$ ) or together with Nedd4-1 ( $\bullet$ ). The number of cells recorded from is indicated in parentheses. \* $P < 0.05$  when compared with control cells transfected with  $\text{Ca}_v2.2\alpha1/\text{Ca}_v\beta2/\text{Ca}_v\alpha2\delta-1$  channels alone.

**Supplemental Material and Methods:**

*Immunocytochemistry:* HEK-293 cells were plated on fibronectin-coated glass-bottom dishes (MatTek) 24 hours before experiment. Forty-eight hours post-transfection, cells were washed once with PBS then fixed using 4% paraformaldehyde PBS pH7.4 for 10 minutes at room temperature. Cells were permeabilized with PBS containing 0.02% Triton X100 (twice for 7 minutes), followed by a 15-minute block with TBS containing 10% goat serum. (Alomone, Jerusalem, Israel) and mouse anti-C-myc (M4439; Sigma-Aldrich Chemie, Postfach, Switzerland) antibodies were used at a dilution of 1/20 and 1/100, respectively and incubated overnight at 4°C. AlexaFluor594 goat anti-rabbit secondary antibodies were incubated 2 hours at room temperature. Confocal images were acquired with a Zeiss LSM-510 confocal laser scanning microscope, using a 60X (1.4 NA) oil-immersion objective. Optical slices were 0.8µm thick. Images were acquired using an argon laser (excitation: 488 nm; emission: BP505–530 nm) and a He-Ne laser (excitation: 543 nm; emission: LP650 nm). Image J was used for analysis.
